# Supplementary material
Source: Springer Nature journal article supplement (https://www.springermedizin.de/resource/supplementary/13024_2011_319_MOESM4_ESM.pdf/9643832)

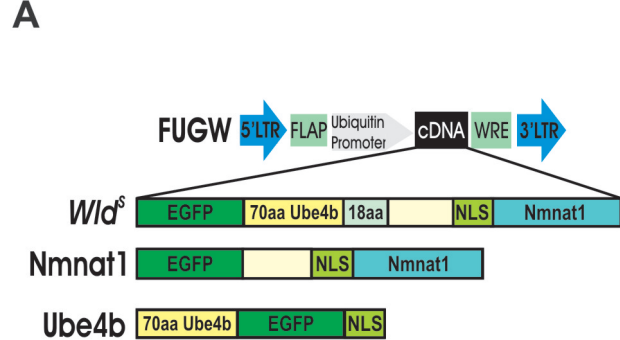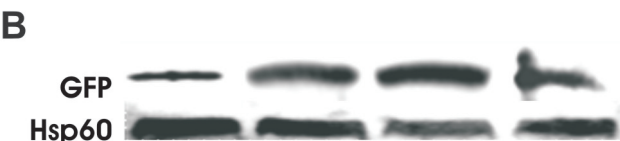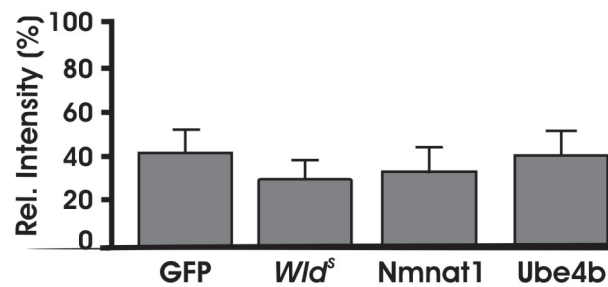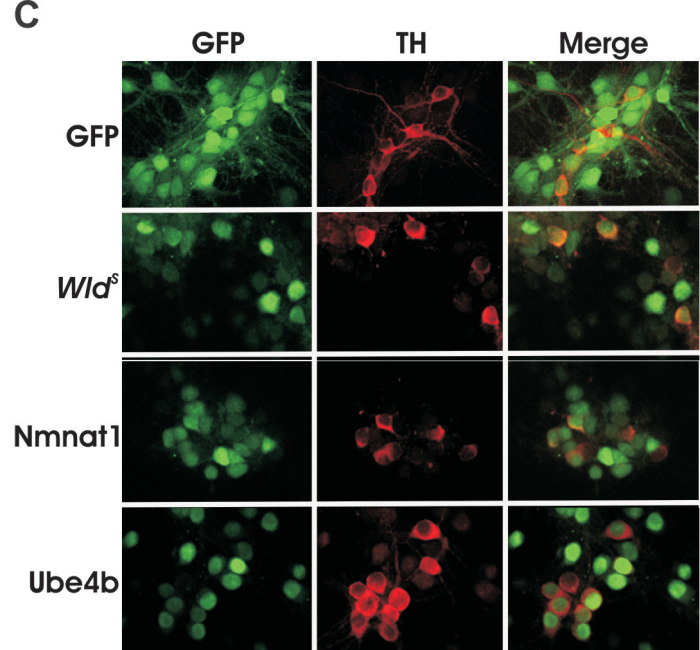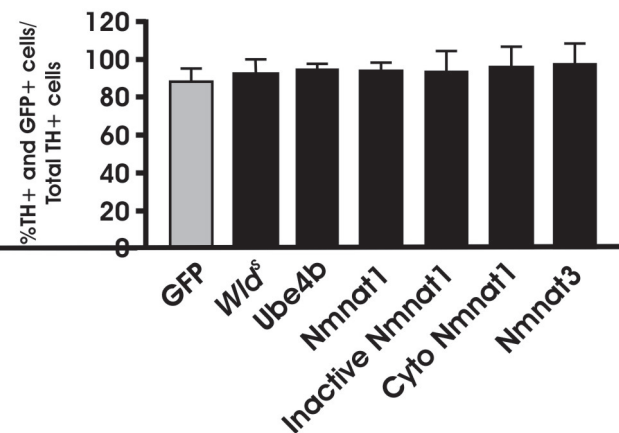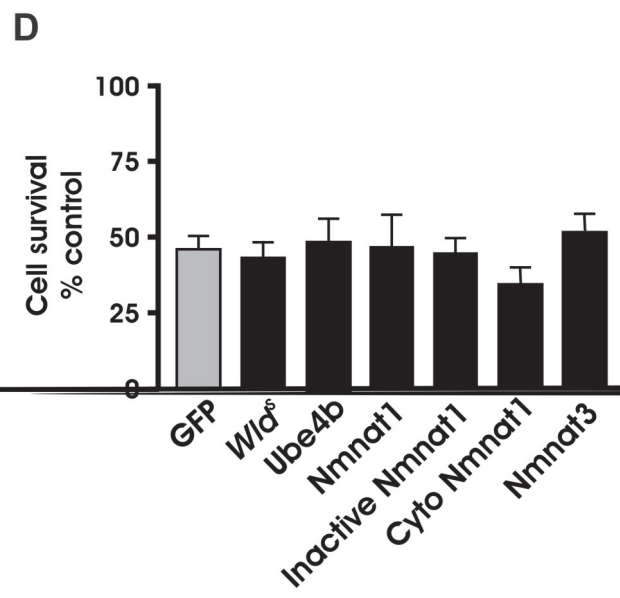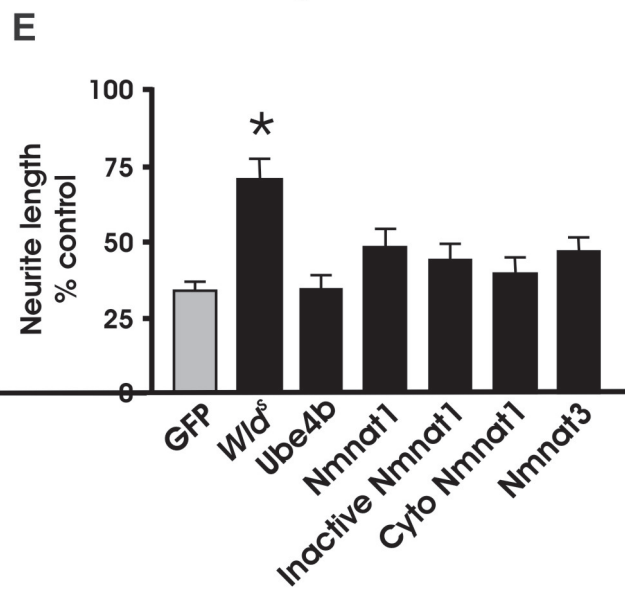

Supplement: MOESM4 [file 9643832]
